# Supplementary material
Source: Royal Society of Chemistry journal article supplement (doi:10.1039/d5nr03761a)
Supplement: d5nr03761a1.pdf [file d5nr03761a1.pdf]

## Supporting Information

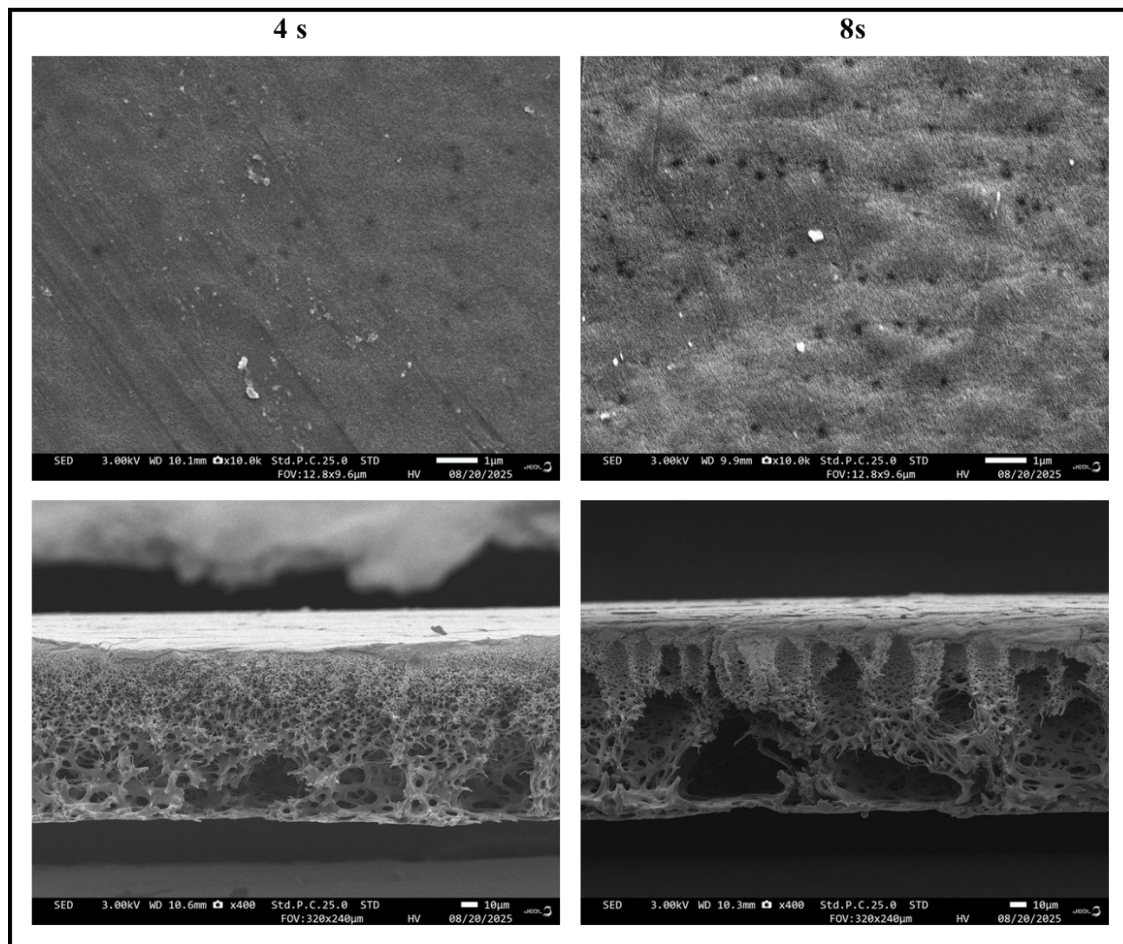

**Figure S1:** Top surface and cross-sectional SEM images of PES Nanofilms prepared at (a)  $t_{\text{exp}} = 4$  s and (b) 8s. Scale bars: 1  $\mu\text{m}$  (surface) and 10  $\mu\text{m}$  (cross-section).
